# Supplementary material
Source: publisher figshare collection journal article supplement (https://karger.figshare.com/ndownloader/files/22124061)
Supplement: Supplementary file 1 [file 22124061]

Appendix 2

Country of residence*

| **ANSWER CHOICES** | **RESPONSES (%)** | **RESPONSES (n°)** |
| --- | --- | --- |
| AE - United Arab Emirates | 0.5% | 1 |
| AM - Armenia | 2.1% | 4 |
| AT - Austria | 4.8% | 9 |
| AZ - Azerbaijan | 0.5% | 1 |
| BE - Belgium | 4.3% | 8 |
| BG - Bulgaria | 3.7% | 7 |
| BH - Bahrain | 0.5% | 1 |
| BR - Brazil | 0.5% | 1 |
| CA - Canada | 0.5% | 1 |
| CH - Switzerland | 3.7% | 7 |
| DE - Germany | 3.2% | 6 |
| DK - Denmark | 6.9% | 13 |
| ES - Spain | 2.1% | 4 |
| ET - Ethiopia | 0.5% | 1 |
| FI - Finland | 0.5% | 1 |
| FR - France | 5.3% | 10 |
| FX - France, Metropolitan | 0.5% | 1 |
| GB - United Kingdom | 4.3% | 8 |
| GE - Georgia | 3.7% | 7 |
| GR - Greece | 2.7% | 5 |
| HR - Croatia | 0.5% | 1 |
| HU - Hungary | 2.1% | 4 |
| IL - Israel | 0.5% | 1 |
| IT - Italy | 16.5% | 31 |
| MK - Macedonia | 1.1% | 2 |
| NL - Netherlands | 3.7% | 7 |
| NO - Norway | 1.1% | 2 |
| PE - Peru | 0.5% | 1 |
| PH - Philippines | 0.5% | 1 |
| PL - Poland | 4.8% | 9 |
| PT - Portugal | 3.7% | 7 |
| RO - Romania | 1.6% | 3 |
| RU - Russia | 2.7% | 5 |
| RS - Serbia | 4.3% | 8 |
| SE - Sweden | 0.5% | 1 |
| Sl - Slovenua | 2.1% | 4 |
| SK - Slovakia | 0.5% | 1 |
| TR - Turkey | 0.5% | 1 |
| US – United States | 1.1% | 2 |
| PS – West Bank | 0.5% | 1 |
| TOTAL |  | 188 |

*33/221 skipped this query
